# Supplementary material for: Hypoxia-independent gene expression signature associated with radiosensitisation of prostate cancer cell lines by histone deacetylase inhibition
Source: PubMed Central journal article supplement — Br J Cancer. 2016 Sep 6;115(8):929–39. doi: 10.1038/bjc.2016.278 (PMC5061908; doi:10.1038/bjc.2016.278), 2016-09-06
Supplement: bjc2016278x1.pdf [file bjc2016278x1.pdf]

# Supplementary Figure S1

DU 145

PC-3

22Rv1

Normoxia  
solvent

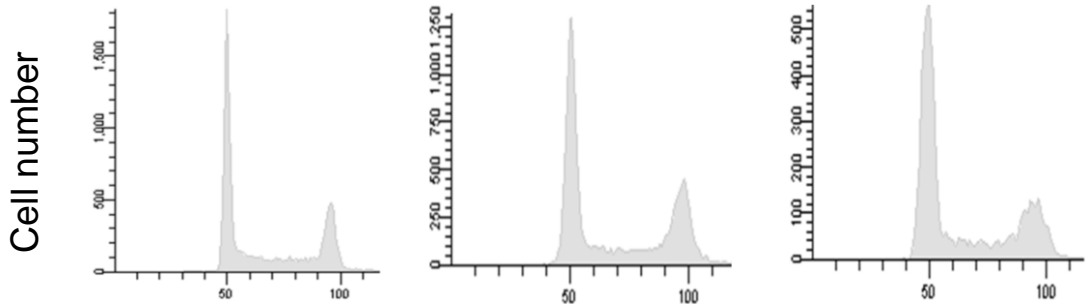

Normoxia  
vorinostat

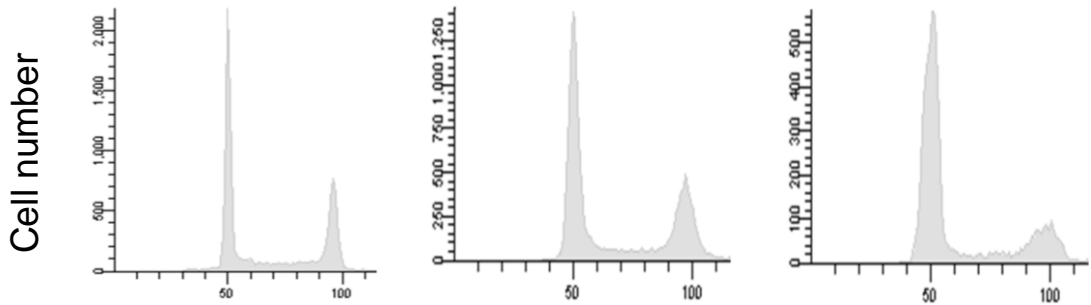

Hypoxia  
solvent

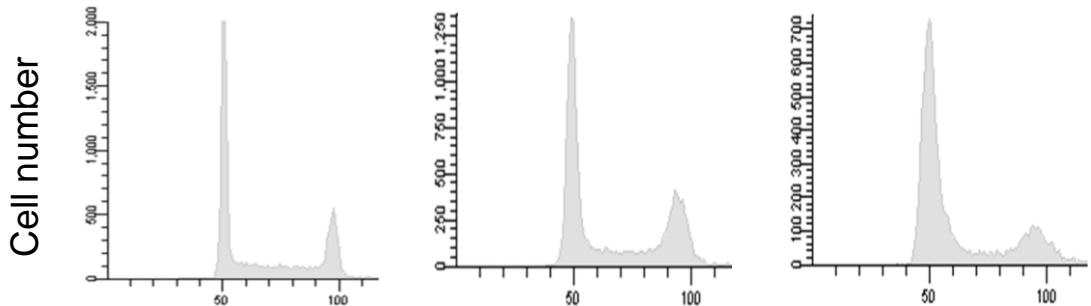

Hypoxia  
vorinostat

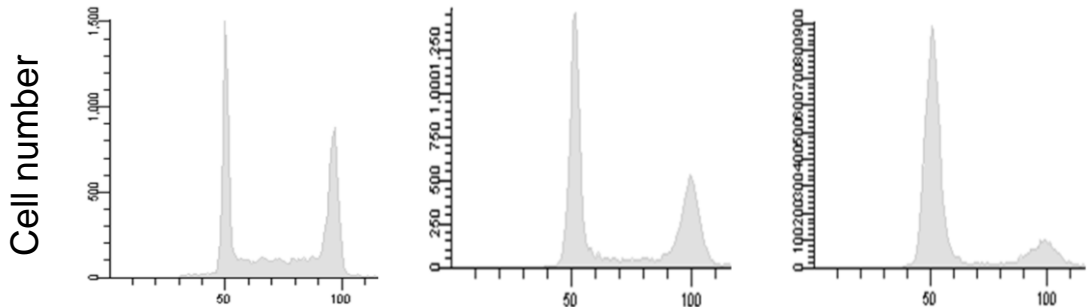

DNA content

DNA content

DNA content

**Supplementary Figure S1. Vorinostat mediated changes in cell cycle distributions.** Typical flow cytometry histograms of DU 145, PC-3 and 22Rv1 prostate cancer cell lines stained with propidium iodide, showing number of cells versus DNA content following combinations of vorinostat (1  $\mu$ M, 24h) and hypoxia (0.2% O<sub>2</sub>, 24h) exposure.
