# Supplementary material for: Hypoxia-independent gene expression signature associated with radiosensitisation of prostate cancer cell lines by histone deacetylase inhibition
Source: PubMed Central journal article supplement — Br J Cancer. 2016 Sep 6;115(8):929–39. doi: 10.1038/bjc.2016.278 (PMC5061908; doi:10.1038/bjc.2016.278), 2016-09-06
Supplement: bjc2016278x2.pdf [file bjc2016278x2.pdf]

# Supplementary Figure S2

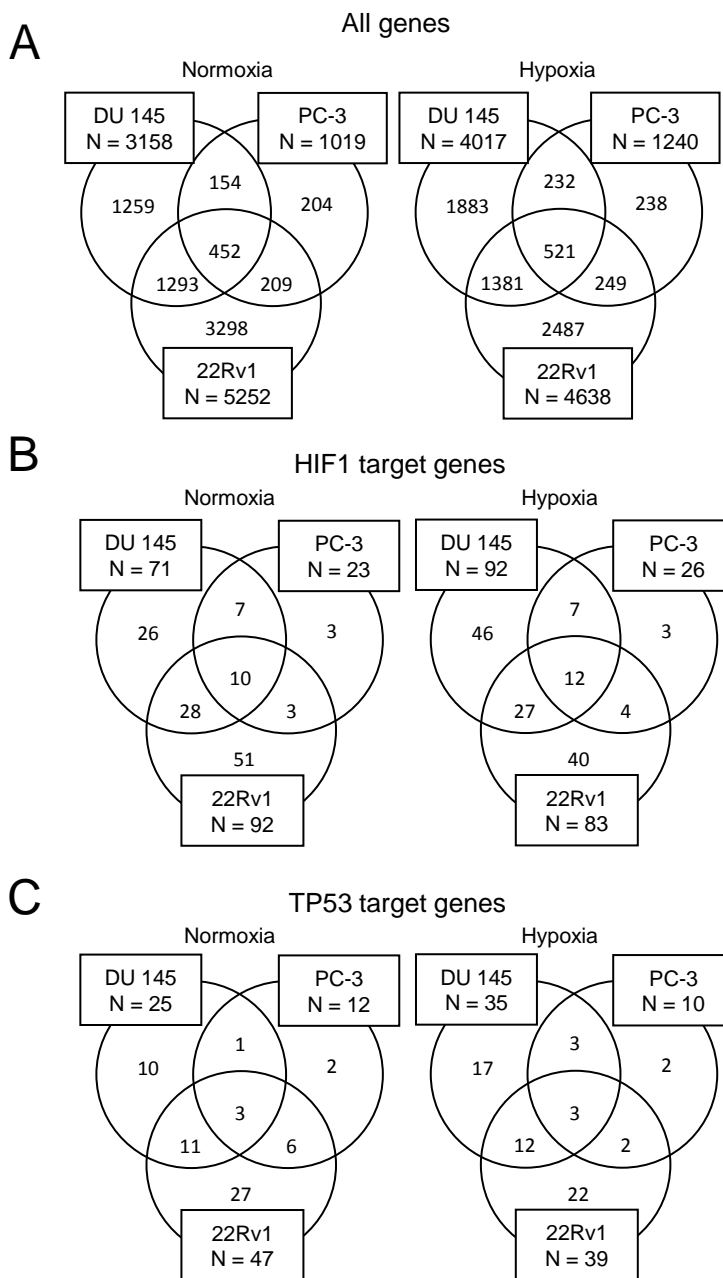

**Supplementary Figure S2. Vorinostat mediated changes in gene expression.** Venn diagrams of differentially expressed genes (A), HIF1 target genes (B) and TP53 target genes (C) (adj  $P < 0.01$ , LIMMA, three experiments) following vorinostat exposure (1  $\mu\text{M}$ , 24h) of DU 145, PC-3 and 22Rv1 prostate cancer cell lines under normoxic and hypoxic conditions (0.2%  $\text{O}_2$ , 24h). Total number of differentially expressed genes, N, is indicated in frames for each cell line, condition and gene group.
