# Supplementary material for: Hypoxia-independent gene expression signature associated with radiosensitisation of prostate cancer cell lines by histone deacetylase inhibition
Source: PubMed Central journal article supplement — Br J Cancer. 2016 Sep 6;115(8):929–39. doi: 10.1038/bjc.2016.278 (PMC5061908; doi:10.1038/bjc.2016.278), 2016-09-06
Supplement: bjc2016278x3.pdf [file bjc2016278x3.pdf]

# Supplementary Figure S3

## HIF1 network, normoxia

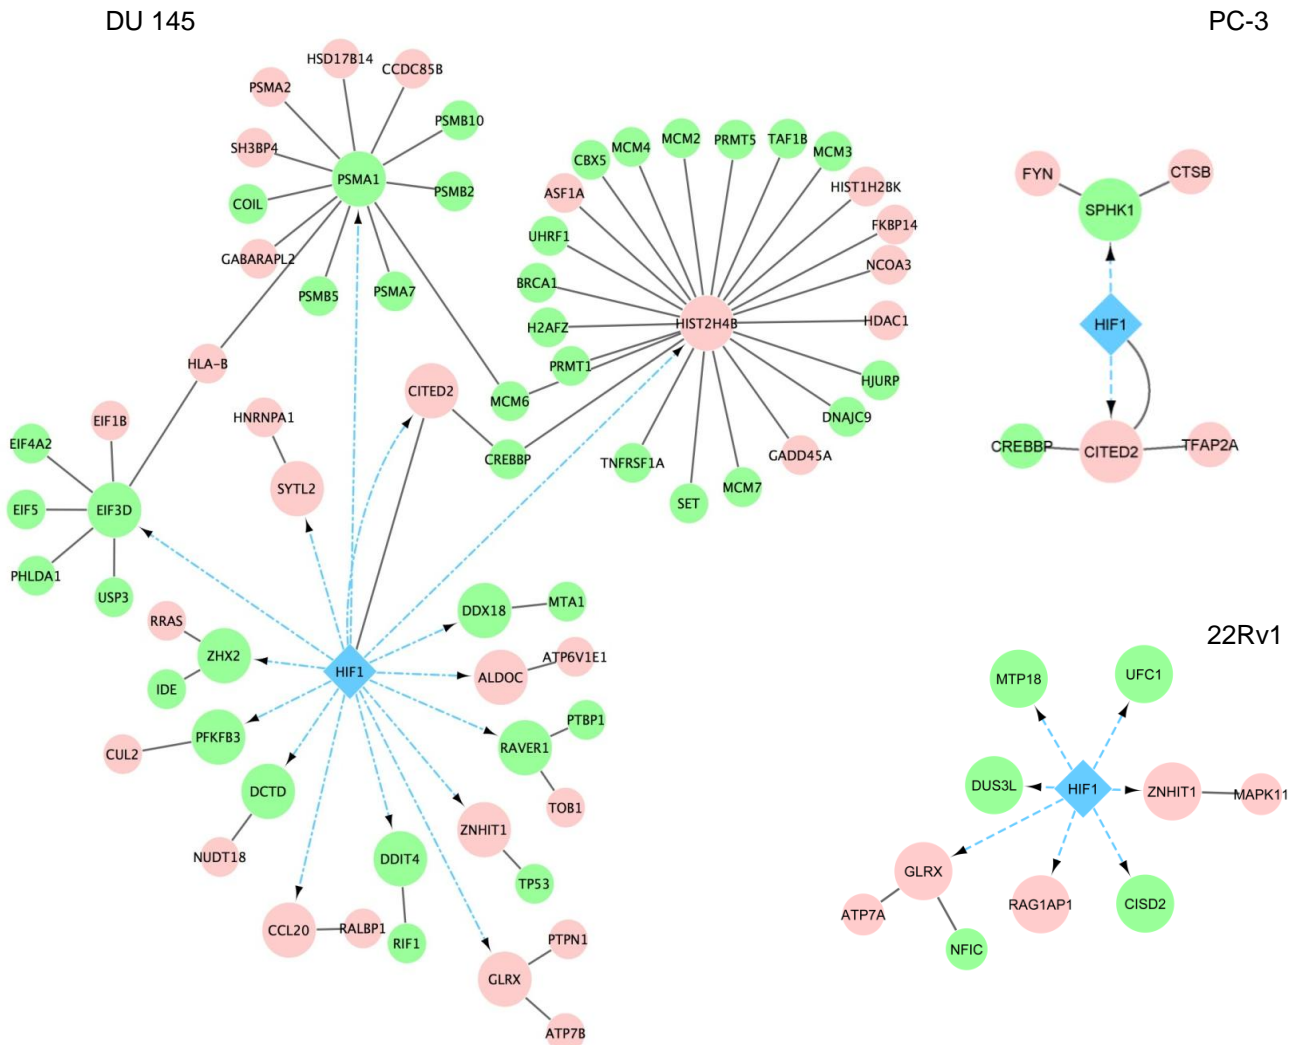

**Supplementary Figure S3. Vorinostat mediated regulation of HIF1 signaling under normoxia.** First degree protein interaction networks of HIF1 target genes (large circles) with a significant and more than 1.5 fold change following vorinostat exposure (1  $\mu$ M, 24 hours) under normoxic conditions in DU 145, PC-3 and 22Rv1 prostate cancer cell lines (adj  $P < 0.01$ , LIMMA, three experiments). The interaction partners (smaller circles) were selected among the genes significantly changed by vorinostat. Green and red color denotes downregulation and upregulation by vorinostat, respectively. Blue arrows indicate DNA-protein interaction between HIF1 and its target genes, black lines indicate protein-protein interaction.
