# Supplementary material for: Hypoxia-independent gene expression signature associated with radiosensitisation of prostate cancer cell lines by histone deacetylase inhibition
Source: PubMed Central journal article supplement — Br J Cancer. 2016 Sep 6;115(8):929–39. doi: 10.1038/bjc.2016.278 (PMC5061908; doi:10.1038/bjc.2016.278), 2016-09-06
Supplement: bjc2016278x5.pdf [file bjc2016278x5.pdf]

## Supplementary Figure S5

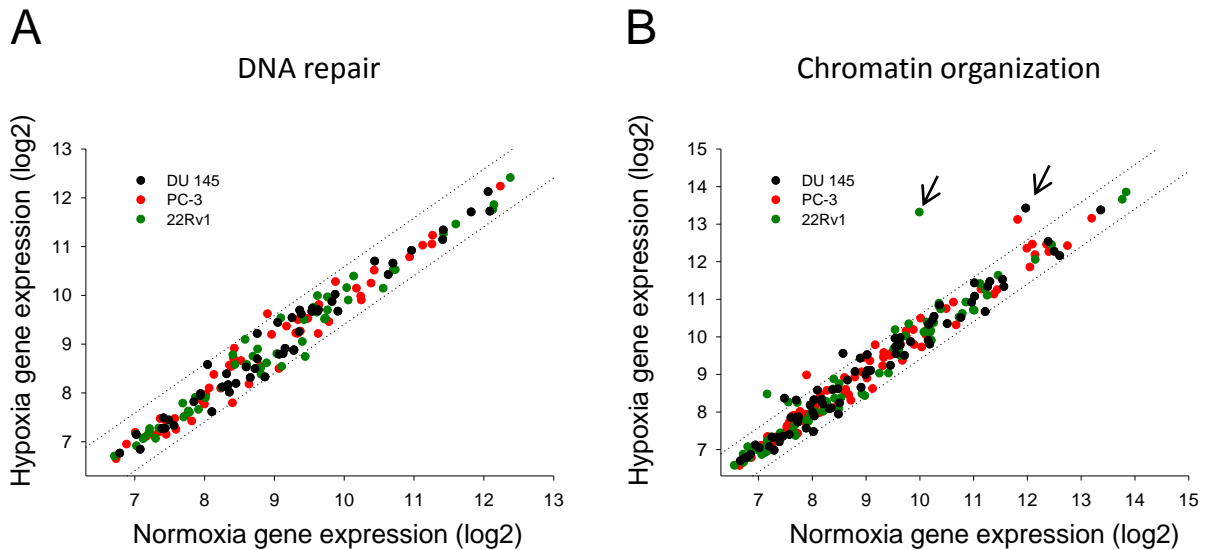

**Supplementary Figure S5. Hypoxia responsiveness of genes differentially expressed by vorinostat.** Gene expression under normoxia versus hypoxia for the DNA repair genes (A) and chromatin organization genes (B) that were significantly more altered by vorinostat in DU 145 than in PC-3 or 22Rv1 prostate cancer cell lines ( $P < 0.05$ , t-test, three experiments). The genes were selected among the ones that were differentially expressed by vorinostat in DU 145 cells (adj  $P < 0.01$ , LIMMA, three experiments). Each point represents the mean value of three independent experiments of DU 145 (black), PC-3 (red) and 22Rv1 (green) cells. Stippled lines indicate limits for 2 fold up- and down regulation by hypoxia. All cell lines showed a highly significant correlation between expression under hypoxia and normoxia ( $P < 0.001$ , Pearson) and only few hypoxia responsive genes were seen. Arrows in (B) point to the hypoxia responsive *BNIP3* gene.
