# Supplementary material for: Hypoxia-independent gene expression signature associated with radiosensitisation of prostate cancer cell lines by histone deacetylase inhibition
Source: PubMed Central journal article supplement — Br J Cancer. 2016 Sep 6;115(8):929–39. doi: 10.1038/bjc.2016.278 (PMC5061908; doi:10.1038/bjc.2016.278), 2016-09-06
Supplement: bjc2016278x6.pdf [file bjc2016278x6.pdf]

**Table S1. Biological processes enriched by vorinostat**

| Biological process <sup>a</sup> | DU 145                |                      | PC-3                  |                      | 22Rv1                 |                      |
|---------------------------------|-----------------------|----------------------|-----------------------|----------------------|-----------------------|----------------------|
|                                 | Normoxia <sup>b</sup> | Hypoxia <sup>b</sup> | Normoxia <sup>b</sup> | Hypoxia <sup>b</sup> | Normoxia <sup>b</sup> | Hypoxia <sup>b</sup> |
| Input genes <sup>c</sup>        | 2992                  | 3791                 | 980                   | 1194                 | 4994                  | 4379                 |
| Cell cycle                      | 183                   | 217                  |                       | 85                   | 342                   | 316                  |
| RNA processing                  | 129                   | 168                  | 49                    |                      | 195                   | 180                  |
| Cellular response to stress     | 131                   | 155                  |                       |                      | 229                   | 222                  |
| <i>DNA damage response</i>      | 97                    | 99                   |                       |                      | 156                   | 158                  |
| <i>DNA repair</i>               | 72                    | 74 <sup>d</sup>      |                       |                      | 118                   | 119                  |
| Chromatin organization          | 86                    | 91 <sup>d</sup>      |                       |                      | 133                   | 124                  |
| Metabolism <sup>e</sup>         | 68                    | 107                  |                       |                      | 100                   |                      |
| Translation                     | 73                    | 103                  |                       |                      | 110                   | 107                  |
| Apoptosis regulation            |                       | 196                  |                       |                      | 256                   | 175                  |

<sup>a</sup>Major biological processes and subprocesses (Italics) significantly enriched at adj  $P < 0.1$ .

<sup>b</sup>Number of genes in the specified biological process.

<sup>c</sup>Genes with GO annotation (biological process)

<sup>d</sup>Not significant based on adj  $P < 0.1$

<sup>e</sup>GO term Generation of precursor metabolites and energy
