# Supplementary material for: Hypoxia-independent gene expression signature associated with radiosensitisation of prostate cancer cell lines by histone deacetylase inhibition
Source: PubMed Central journal article supplement — Br J Cancer. 2016 Sep 6;115(8):929–39. doi: 10.1038/bjc.2016.278 (PMC5061908; doi:10.1038/bjc.2016.278), 2016-09-06
Supplement: bjc2016278x7.pdf [file bjc2016278x7.pdf]

**Table S2. DNA repair gene expression associated with HDACi mediated radiosensitisation**

Log2-transformed mean expression ratios in DU 145, vorinostat treated vs control, of three independent experiments are listed. Genes that were significantly changed in DU 145 (adj P<0.001, LIMMA) and more up- or downregulated in DU 145 than in PC-3 or 22RV1 (P < 0.05, t-test) are included.

24 shaded genes were significantly more altered in DU 145 under both normoxia and hypoxia and included in the radiosensitisation signature.

5 genes in bold were differentially expressed in DU 145 at baseline (normoxia and hypoxia) compared with both PC-3 and 22Rv1.

|                  |              | Change by vorinostat |       |         |       |
|------------------|--------------|----------------------|-------|---------|-------|
|                  |              | Normoxia             |       | Hypoxia |       |
| Illumina ProbeID | Gene         | Ratio                | adj P | Ratio   | adj P |
| ILMN_1713732     | <b>ABL1</b>  | -0.39                | 0.00  | -0.52   | 0.00  |
| ILMN_1690252     | ALKBH2       | 0.43                 | 0.00  | 0.44    | 0.00  |
| ILMN_1712019     | ANKRD17      | -0.38                | 0.01  | -0.32   | 0.00  |
| ILMN_1661886     | <b>APEX1</b> | -0.86                | 0.00  | -0.67   | 0.00  |
| ILMN_2317348     | APTX         | 0.41                 | 0.00  | 0.21    | 0.17  |
| ILMN_1711823     | C17orf70     | 0.14                 | 0.24  | 0.52    | 0.00  |
| ILMN_1655485     | C1orf124     | -0.44                | 0.00  | -0.49   | 0.00  |
| ILMN_1676631     | CCNO         | -0.60                | 0.00  | -0.38   | 0.00  |
| ILMN_1748883     | CDKN2D       | 0.92                 | 0.00  | 0.94    | 0.00  |
| ILMN_1760593     | <b>CRY1</b>  | 0.49                 | 0.00  | 0.51    | 0.00  |
| ILMN_1720708     | CSNK1D       | -0.55                | 0.00  | -0.74   | 0.00  |
| ILMN_1695792     | CUL4A        | -0.50                | 0.00  | -0.71   | 0.00  |
| ILMN_1811616     | EEP1         | 0.34                 | 0.00  | 0.26    | 0.01  |
| ILMN_1797172     | ERCC1        | 0.31                 | 0.00  | 0.30    | 0.01  |
| ILMN_1682747     | FANCA        | -0.30                | 0.00  | -0.20   | 0.08  |
| ILMN_1701455     | FBXO6        | -0.32                | 0.00  | -0.34   | 0.01  |
| ILMN_2052208     | GADD45A      | 0.76                 | 0.00  | 0.68    | 0.00  |
| ILMN_1726693     | GTF2H1       | -0.24                | 0.00  | -0.38   | 0.00  |
| ILMN_1660582     | LIG3         | -0.59                | 0.00  | -0.41   | 0.00  |
| ILMN_2325394     | MSH5         | 0.41                 | 0.00  | 0.41    | 0.01  |
| ILMN_1695797     | NCOA6        | -0.18                | 0.24  | -0.68   | 0.00  |
| ILMN_1715680     | <b>NEIL2</b> | -0.70                | 0.00  | -0.69   | 0.00  |
| ILMN_1757697     | NEIL3        | -0.66                | 0.00  | -0.69   | 0.00  |
| ILMN_2052790     | NONO         | -0.14                | 0.09  | -0.27   | 0.01  |
| ILMN_1756793     | POLS         | -0.37                | 0.00  | -0.65   | 0.00  |

|              |            |       |      |       |      |
|--------------|------------|-------|------|-------|------|
| ILMN_2321634 | RAD17      | 0.31  | 0.00 | 0.40  | 0.00 |
| ILMN_2221006 | RAD21      | -0.20 | 0.09 | -0.44 | 0.00 |
| ILMN_1751571 | RAD23A     | -0.29 | 0.00 | -0.19 | 0.09 |
| ILMN_2238928 | RAD51C     | 0.26  | 0.03 | 0.48  | 0.01 |
| ILMN_1739101 | RBBP8      | -0.35 | 0.00 | -0.11 | 0.44 |
| ILMN_1700604 | RBM14      | -0.56 | 0.00 | -0.78 | 0.00 |
| ILMN_1680850 | RECQL      | 0.17  | 0.02 | 0.66  | 0.00 |
| ILMN_2395474 | REV1       | -0.26 | 0.00 | -0.29 | 0.01 |
| ILMN_2217935 | RFC1       | 0.47  | 0.00 | 0.24  | 0.23 |
| ILMN_1716895 | RPA3       | 0.55  | 0.00 | 0.80  | 0.00 |
| ILMN_1770339 | RPAIN      | 0.08  | 0.34 | 0.55  | 0.00 |
| ILMN_1712678 | RPS27L     | 0.68  | 0.00 | 0.81  | 0.00 |
| ILMN_1804642 | SMUG1      | 0.71  | 0.00 | 0.69  | 0.00 |
| ILMN_2233099 | SSRP1      | -0.40 | 0.00 | -0.57 | 0.00 |
| ILMN_2331231 | TNFRSF6B   | -1.32 | 0.00 | -1.13 | 0.00 |
| ILMN_1779356 | TP53       | -0.80 | 0.00 | -0.56 | 0.03 |
| ILMN_1706455 | TTC5       | 0.29  | 0.00 | 0.48  | 0.00 |
| ILMN_1793651 | UBE2N      | 0.63  | 0.00 | 0.50  | 0.00 |
| ILMN_1691188 | UIMC1      | -0.32 | 0.00 | -0.44 | 0.00 |
| ILMN_1683120 | UNG        | -1.23 | 0.00 | -1.25 | 0.00 |
| ILMN_1761069 | UVRAG      | -0.19 | 0.02 | -0.29 | 0.00 |
| ILMN_1777220 | <b>VCP</b> | -0.23 | 0.01 | -0.55 | 0.00 |
| ILMN_1670172 | WDR33      | 0.67  | 0.00 | 0.74  | 0.00 |
| ILMN_1679881 | WRN        | -0.33 | 0.00 | -0.15 | 0.09 |
| ILMN_1743097 | XRCC6      | -0.37 | 0.00 | -0.54 | 0.00 |
| ILMN_1767481 | XRCC6BP1   | 0.50  | 0.00 | 0.83  | 0.00 |
