# Supplementary material for: Hypoxia-independent gene expression signature associated with radiosensitisation of prostate cancer cell lines by histone deacetylase inhibition
Source: PubMed Central journal article supplement — Br J Cancer. 2016 Sep 6;115(8):929–39. doi: 10.1038/bjc.2016.278 (PMC5061908; doi:10.1038/bjc.2016.278), 2016-09-06
Supplement: bjc2016278x8.pdf [file bjc2016278x8.pdf]

**Table S3. Chromatin organization gene expression associated with HDACi mediated radiosensitisation**

Log2-transformed mean expression ratios in DU 145, vorinostat treated vs control, of three independent experiments are listed. Genes that were significantly changed in DU 145 (adj P<0.001, LIMMA) and more up- or downregulated in DU 145 than in PC-3 or 22RV1 (P < 0.05, t-test) are included.

32 shaded genes were significantly more altered in DU 145 under both normoxia and hypoxia and included in the radiosensitisation signature.

5 genes in bold were differentially expressed in DU 145 at baseline (normoxia and hypoxia) compared with both PC-3 and 22Rv1.

|                  |              | Change by vorinostat |       |         |       |
|------------------|--------------|----------------------|-------|---------|-------|
|                  |              | Normoxia             |       | Hypoxia |       |
| Illumina ProbeID | Gene         | Ratio                | adj P | Ratio   | adj P |
| ILMN_1813840     | AOF2         | 0.43                 | 0.00  | 0.23    | 0.05  |
| ILMN_1797341     | ARID1A       | -0.40                | 0.07  | -0.66   | 0.00  |
| ILMN_1773117     | BCOR         | -0.18                | 0.33  | -0.35   | 0.01  |
| ILMN_1700915     | BMI1         | 0.52                 | 0.00  | 0.39    | 0.00  |
| ILMN_1724658     | BNIP3        | -0.36                | 0.01  | -0.40   | 0.00  |
| ILMN_1667928     | BRDT         | 0.23                 | 0.08  | 0.35    | 0.01  |
| ILMN_1790136     | C20orf20     | -0.72                | 0.00  | -0.78   | 0.00  |
| ILMN_1680134     | CARM1        | -0.44                | 0.00  | -0.51   | 0.00  |
| ILMN_1762972     | CHD9         | -0.35                | 0.09  | -0.50   | 0.00  |
| ILMN_1809583     | CREBBP       | -0.69                | 0.00  | -0.89   | 0.00  |
| ILMN_1665164     | CTR9         | 0.27                 | 0.04  | 0.37    | 0.01  |
| ILMN_2378952     | GPX4         | 0.35                 | 0.01  | 0.48    | 0.00  |
| ILMN_1757467     | <b>H1FO</b>  | 1.10                 | 0.00  | 1.38    | 0.00  |
| ILMN_1773964     | H1FX         | 0.49                 | 0.03  | 0.74    | 0.00  |
| ILMN_1708728     | H2AFJ        | 0.78                 | 0.00  | 0.73    | 0.00  |
| ILMN_1706784     | H2AFV        | 0.37                 | 0.03  | 0.49    | 0.00  |
| ILMN_1705570     | H2AFY2       | -1.30                | 0.00  | -1.62   | 0.00  |
| ILMN_2106331     | H3F3A        | 0.14                 | 0.48  | 0.33    | 0.01  |
| ILMN_1695706     | <b>H3F3B</b> | 0.80                 | 0.00  | 0.77    | 0.00  |
| ILMN_1727458     | <b>HDAC1</b> | 0.79                 | 0.00  | 1.33    | 0.00  |
| ILMN_3266186     | HDAC7        | -0.30                | 0.00  | -0.25   | 0.01  |
| ILMN_1757406     | HIST1H1C     | 1.33                 | 0.00  | 0.95    | 0.00  |
| ILMN_1792689     | HIST1H2AC    | 0.80                 | 0.00  | 0.65    | 0.07  |
| ILMN_1680937     | HIST1H2BC    | 0.55                 | 0.00  | 0.51    | 0.01  |
| ILMN_1651496     | HIST1H2BD    | 1.54                 | 0.00  | 1.16    | 0.00  |

|              |              |       |      |       |      |
|--------------|--------------|-------|------|-------|------|
| ILMN_1687947 | HIST1H2BE    | 0.32  | 0.01 | 0.25  | 0.07 |
| ILMN_1716195 | HIST1H2BG    | 0.46  | 0.00 | 0.64  | 0.00 |
| ILMN_1796179 | HIST1H2BK    | 0.52  | 0.00 | 0.50  | 0.03 |
| ILMN_1788489 | HIST1H3F     | 0.43  | 0.07 | 0.48  | 0.00 |
| ILMN_1726815 | HIST1H3G     | 0.30  | 0.01 | 0.55  | 0.00 |
| ILMN_1749368 | HIST1H3H     | 0.58  | 0.00 | 0.43  | 0.00 |
| ILMN_1751120 | HIST1H4H     | 0.99  | 0.00 | 0.78  | 0.04 |
| ILMN_2144426 | HIST2H2AA3   | 0.95  | 0.00 | 0.24  | 0.66 |
| ILMN_1768973 | HIST2H2AC    | 0.77  | 0.00 | 0.24  | 0.49 |
| ILMN_1732071 | HIST2H2BE    | 0.63  | 0.00 | 0.33  | 0.27 |
| ILMN_2115340 | HIST2H4A     | 1.25  | 0.00 | 1.26  | 0.00 |
| ILMN_3238233 | HIST2H4B     | 0.90  | 0.00 | 0.98  | 0.00 |
| ILMN_1798588 | HLTF         | 0.51  | 0.00 | 0.61  | 0.00 |
| ILMN_1651315 | HMG20B       | -0.66 | 0.00 | -0.86 | 0.00 |
| ILMN_2381603 | ING3         | 0.16  | 0.30 | 0.29  | 0.00 |
| ILMN_1755911 | ING5         | -0.44 | 0.00 | -0.35 | 0.00 |
| ILMN_1722532 | JMJD1A       | -0.41 | 0.00 | -0.64 | 0.00 |
| ILMN_1782247 | KAT2A        | -0.88 | 0.00 | -0.68 | 0.00 |
| ILMN_1706539 | KDM3B        | -0.69 | 0.00 | -0.67 | 0.00 |
| ILMN_2336109 | L3MBTL2      | -0.64 | 0.00 | -0.44 | 0.00 |
| ILMN_3192316 | LOC100129237 | -0.60 | 0.00 | -0.54 | 0.02 |
| ILMN_3265797 | LOC100130561 | 0.39  | 0.05 | 0.53  | 0.00 |
| ILMN_3284119 | LOC399804    | -0.43 | 0.00 | -0.45 | 0.00 |
| ILMN_1702585 | LOC646817    | -0.86 | 0.00 | -0.53 | 0.00 |
| ILMN_3227604 | LOC729342    | -0.35 | 0.00 | -0.13 | 0.22 |
| ILMN_1698491 | MBD3         | -0.55 | 0.00 | -0.50 | 0.00 |
| ILMN_1773763 | MTA2         | -0.39 | 0.01 | -0.42 | 0.01 |
| ILMN_1699208 | NAP1L1       | -0.30 | 0.10 | -0.53 | 0.00 |
| ILMN_1773307 | NAP1L5       | 0.71  | 0.00 | 0.70  | 0.00 |
| ILMN_1692651 | PHB          | 0.50  | 0.00 | 0.67  | 0.00 |
| ILMN_1795285 | PHF15        | -0.46 | 0.01 | -0.61 | 0.00 |
| ILMN_2403889 | PRMT5        | -0.36 | 0.01 | -0.04 | 0.81 |
| ILMN_1700604 | RBM14        | -0.56 | 0.00 | -0.78 | 0.00 |
| ILMN_1666399 | RING1        | 0.56  | 0.00 | 0.37  | 0.00 |
| ILMN_1723494 | SIRT2        | 0.48  | 0.00 | 0.57  | 0.00 |
| ILMN_2376263 | SMARCA1      | -0.42 | 0.01 | -0.70 | 0.00 |
| ILMN_1741954 | SMYD3        | 0.39  | 0.01 | 0.15  | 0.18 |
| ILMN_1813277 | SUPT3H       | -0.43 | 0.00 | -0.27 | 0.02 |

|              |         |       |      |       |      |
|--------------|---------|-------|------|-------|------|
| ILMN_1766245 | SUPT4H1 | 0.10  | 0.43 | 0.41  | 0.00 |
| ILMN_1781479 | SUV39H1 | -0.78 | 0.00 | -0.80 | 0.00 |
| ILMN_1674866 | TADA3   | 0.26  | 0.05 | 0.44  | 0.00 |
| ILMN_1653367 | TAF12   | 0.14  | 0.53 | 0.38  | 0.00 |
| ILMN_1811029 | TLK1    | -0.37 | 0.00 | -0.43 | 0.00 |
| ILMN_1663486 | TLK2    | -0.55 | 0.00 | -0.30 | 0.09 |
| ILMN_1660368 | TRRAP   | -0.53 | 0.12 | -0.62 | 0.00 |
| ILMN_1779014 | TSPYL1  | 0.89  | 0.00 | 0.71  | 0.00 |
| ILMN_1693635 | TSPYL2  | 0.30  | 0.03 | 0.33  | 0.01 |
| ILMN_1806778 | UBE2E1  | -0.36 | 0.03 | -0.40 | 0.00 |
| ILMN_1793651 | UBE2N   | 0.63  | 0.00 | 0.50  | 0.00 |
| ILMN_1691188 | UIMC1   | -0.32 | 0.00 | -0.44 | 0.00 |
| ILMN_1780887 | USP21   | -0.45 | 0.00 | -0.31 | 0.00 |
| ILMN_1666609 | USP22   | 0.02  | 1.00 | -0.41 | 0.00 |
| ILMN_1745423 | UTP3    | 0.44  | 0.00 | 0.55  | 0.01 |
